# Supplementary material for: TiBALDH as a precursor for biomimetic TiO2 synthesis: stability aspects in aqueous media
Source: Royal Society of Chemistry journal article supplement (doi:10.1039/c9ra05923g), 2019-01-01
Supplement: c9ra05923g1.pdf [file c9ra05923g1.pdf]

## Supporting Information

### **TiBALDH as a precursor for biomimetic TiO<sub>2</sub> synthesis: stability aspects in aqueous media**

*Armin Hernández-Gordillo,<sup>†,‡</sup> Andrés Hernández-Arana,<sup>†</sup> Antonio Campero-Celis,<sup>‡</sup>  
Liliana Irais Vera-Robles<sup>†</sup>*

<sup>†</sup>Departamento de Química, Área de Biofísicoquímica, Universidad Autónoma Metropolitana-Iztapalapa, San Rafael Atlixco 186, Col. Vicentina, 09340, CDMX, México.

<sup>‡</sup>Departamento de Química, Área de Química Inorgánica, Universidad Autónoma Metropolitana-Iztapalapa, San Rafael Atlixco 186, Col. Vicentina, 09340, CDMX, México.

Methodology for matrix-assisted laser desorption/ionization time-of-flight mass spectrometry (MALDI-TOF MS):

An aqueous solution of TiBALDH 10 mM (24h of aging) was diluted 1:100 in formic acid (1%). A 0.5 µL sample of the mixture was deposited on the target. The measurements were performed on a Bruker Autoflex Speed TOF-MS.

a)

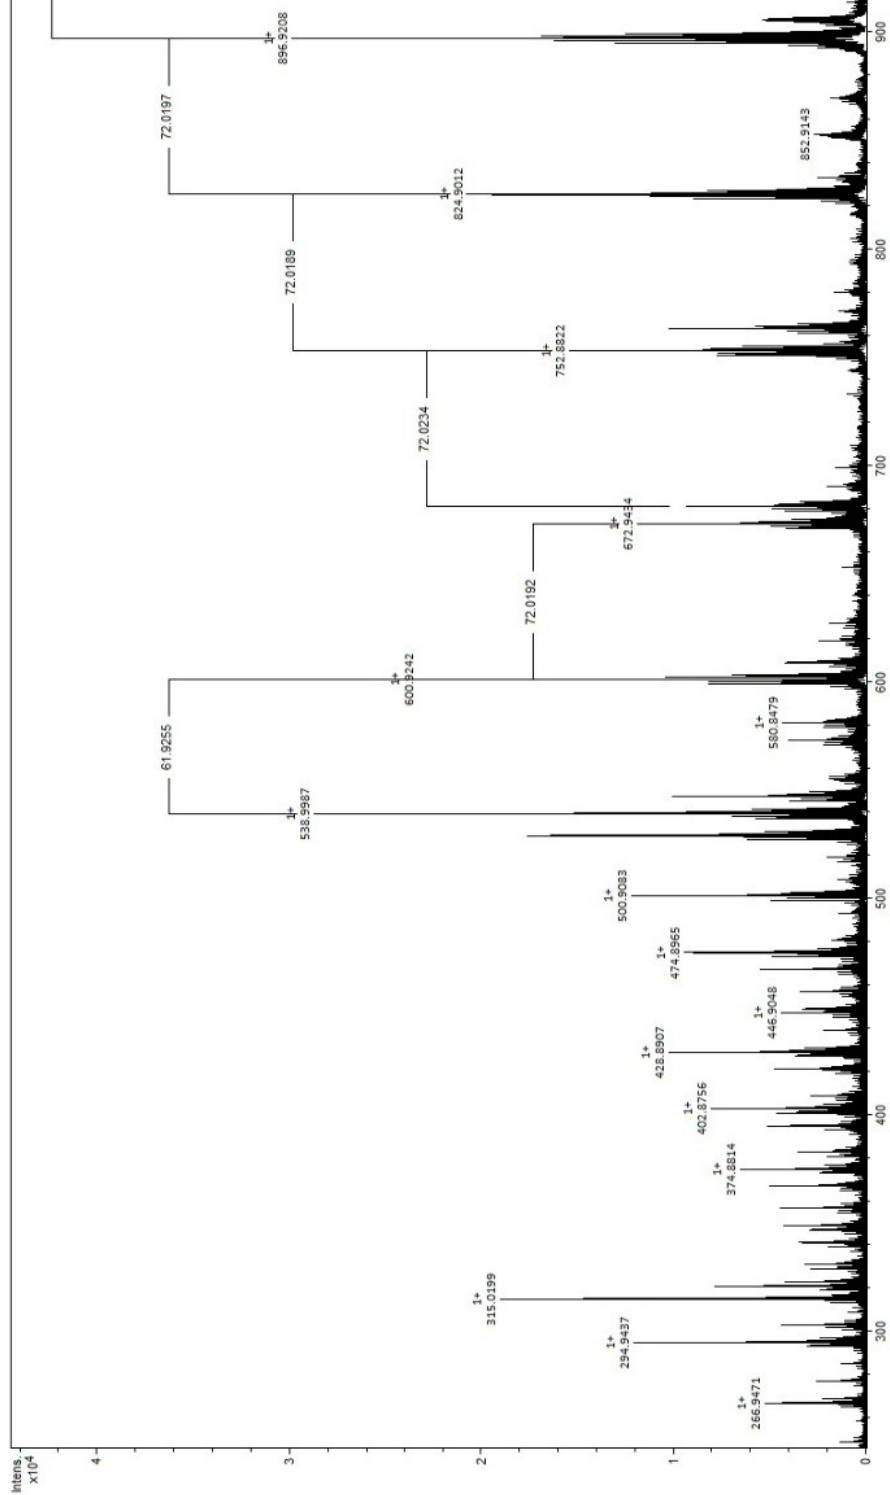



**Figure S2.** Reactions mechanism proposed for the precipitation of TiBALDH with DNA. Phosphate groups coordinate the Ti(IV) on the surface of anatase nanoparticles (MTSALs).

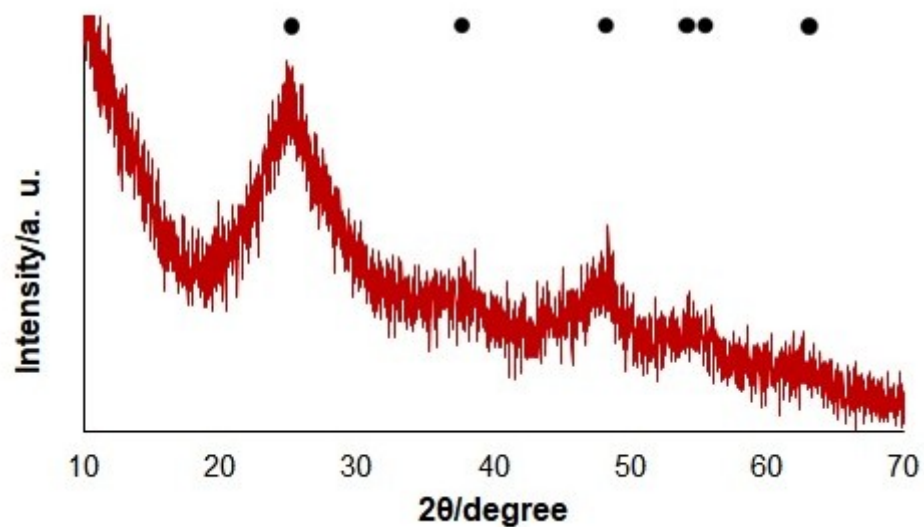

**Figure S3.** X-ray diffraction of the dried gel formed with TiBALDH at basic pH. Circles indicates position of diffraction peaks corresponding to anatase phase.
